# Supplementary material
Source: Royal Society of Chemistry journal article supplement (doi:10.1039/d6gc00476h)
Supplement: d6gc00476h1.pdf [file d6gc00476h1.pdf]

## Supporting Information

### Highly Efficient Microwave-Accelerated Transfer Hydrogenation for CO<sub>2</sub>-Derived Carbonate Valorization by Ru(II)-Protic NHC Pincer Catalysts

Achena Saha, Shambhu Nath, Ekta Yadav, and Amrendra K. Singh\*

Department of Chemistry, Indian Institute of Technology Indore, Simrol, Indore 452020, India

\*Corresponding author. Email: [aks@iiti.ac.in](mailto:aks@iiti.ac.in)

## Table of Contents

| S. No. | Contents                                                                                                                                                                                                                          | Page No. |
|--------|-----------------------------------------------------------------------------------------------------------------------------------------------------------------------------------------------------------------------------------|----------|
| 1.     | Figure S1-S2. $^1\text{H}$ NMR and $^{13}\text{C}\{^1\text{H}\}$ NMR of complex <b>Ru9</b>                                                                                                                                        | S3       |
| 2.     | Figure S3. HRMS of complex <b>Ru9</b>                                                                                                                                                                                             | S4       |
| 3.     | Figure S4-S5. $^1\text{H}$ NMR and $^{13}\text{C}\{^1\text{H}\}$ NMR of complex <b>Ru10</b>                                                                                                                                       | S5       |
| 4.     | Figure S6. HRMS of complex <b>Ru10</b>                                                                                                                                                                                            | S6       |
| 5.     | General procedure for thermal transfer hydrogenation of inorganic carbonates using glycerol.                                                                                                                                      | S6       |
| 6.     | General procedure for microwave-accelerated transfer hydrogenation of inorganic carbonates using glycerol.                                                                                                                        | S7       |
| 7.     | Figure S7. $^1\text{H}$ NMR spectrum of an aliquot of the reaction mixture performed with glycerol.                                                                                                                               | S7       |
| 8.     | Table S1. Catalytic activity of Ru(II) NHC complexes in the microwave-accelerated transfer hydrogenation of varying amounts of carbonate salt using glycerol as the hydrogen source.                                              | S7-S8    |
| 8.     | Table S2. Table presenting activity catalyst <b>Ru10</b> for transfer hydrogenation of different carbonate salts from glycerol, based on observed turnover numbers and turnover frequencies for 1,2-PDO, FA, and LA               | S8       |
| 9.     | Table S3. Table summarizing the activity of <b>Ru10</b> for the transfer hydrogenation of different amounts of carbonate salt from glycerol, based on observed turnover numbers and turnover frequencies for 1,2-PDO, FA, and LA. | S9       |
| 10.    | Procedure for time-dependent monitoring of the catalytic reaction                                                                                                                                                                 | S9-S11   |
| 11.    | NMR experiments for mechanistic investigation.                                                                                                                                                                                    | S11-S18  |
| 12.    | Mechanistic investigation using Mass spectrometry.                                                                                                                                                                                | S18-S21  |
| 13.    | Homogeneity test and radical trapping experiment                                                                                                                                                                                  | S21      |
| 14.    | Crystallographic Data: Table S5 Crystal data and structure refinement parameters.                                                                                                                                                 | S22      |
| 15.    | General method for transfer hydrogenation of acetophenone and corresponding GC-MS and NMR data                                                                                                                                    | S23-S26  |

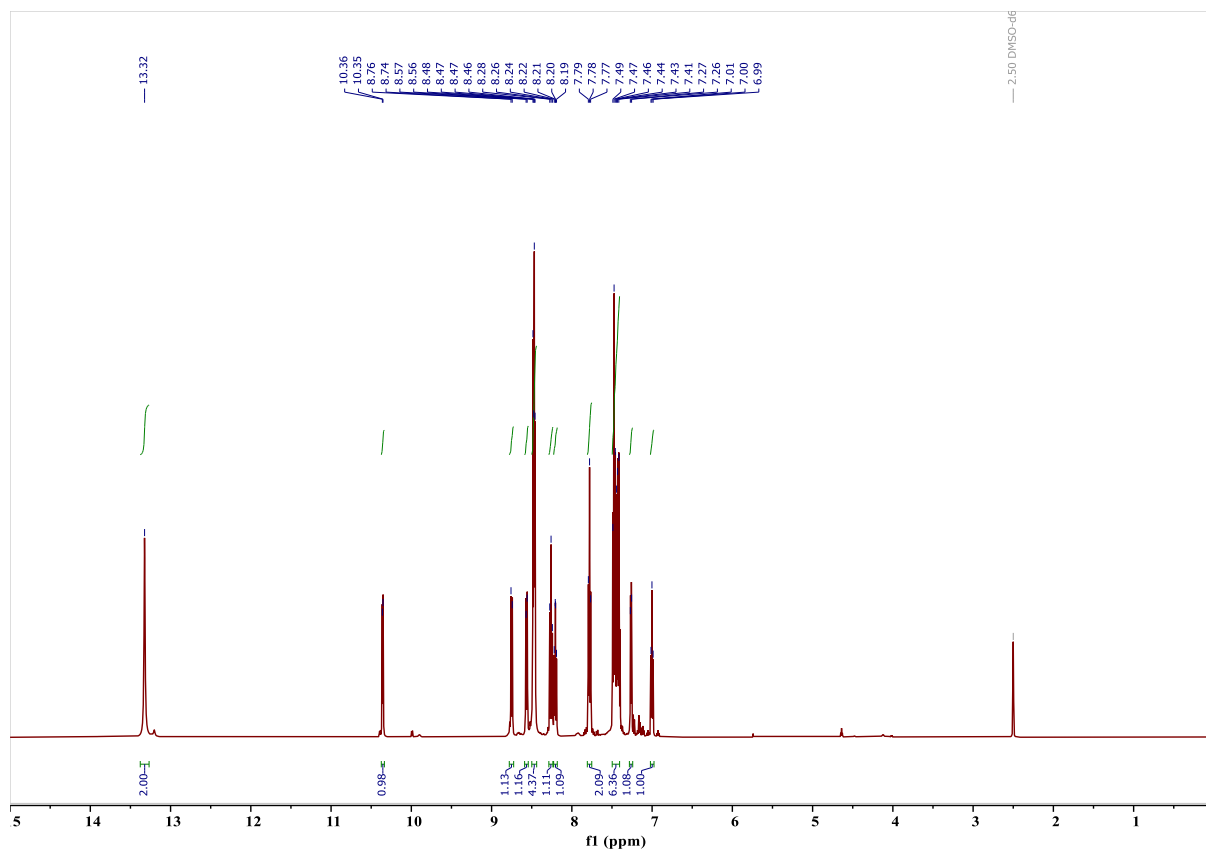

Figure S1  $^1\text{H}$  NMR of complex **Ru9** in  $\text{DMSO-d}_6$  solution.

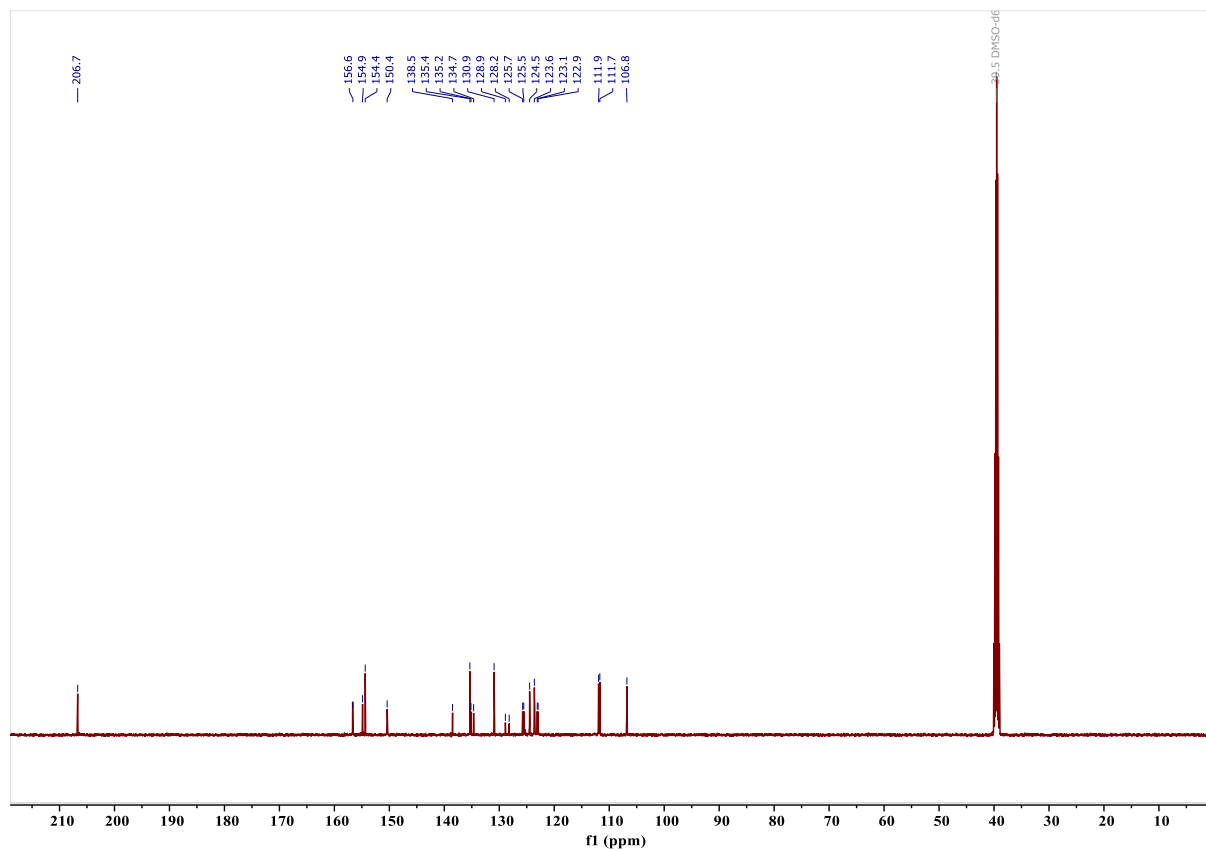

Figure S2  $^{13}\text{C}\{^1\text{H}\}$  NMR of complex **Ru9** in  $\text{DMSO-d}_6$  solution.

# Generic Display Report

## Analysis Info

Analysis Name D:\Documents\mass\m chem aks-as-2-227\_RC1\_01\_15046.d  
Method 8. W M.m  
Sample Name m chem aks-as-2-227  
Comment

Acquisition Date 19-11-2024 11:25:46  
Operator Ghanashyam Bhavsar  
Instrument micrOTOF-Q

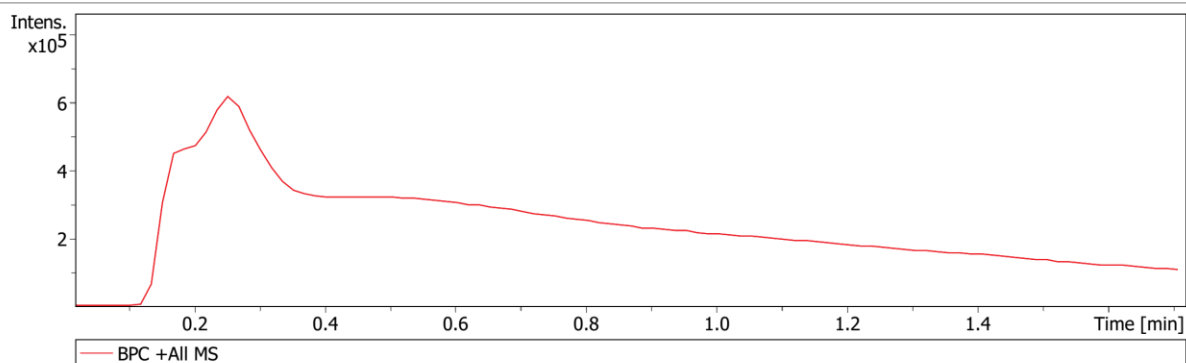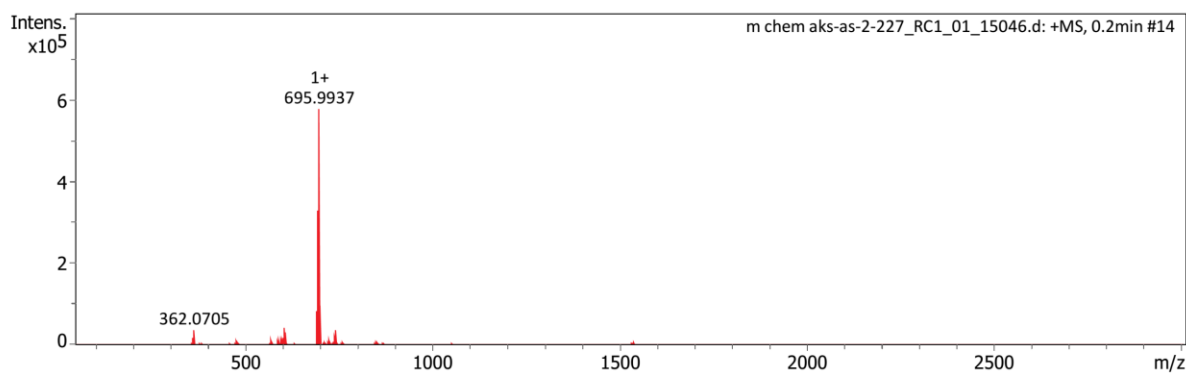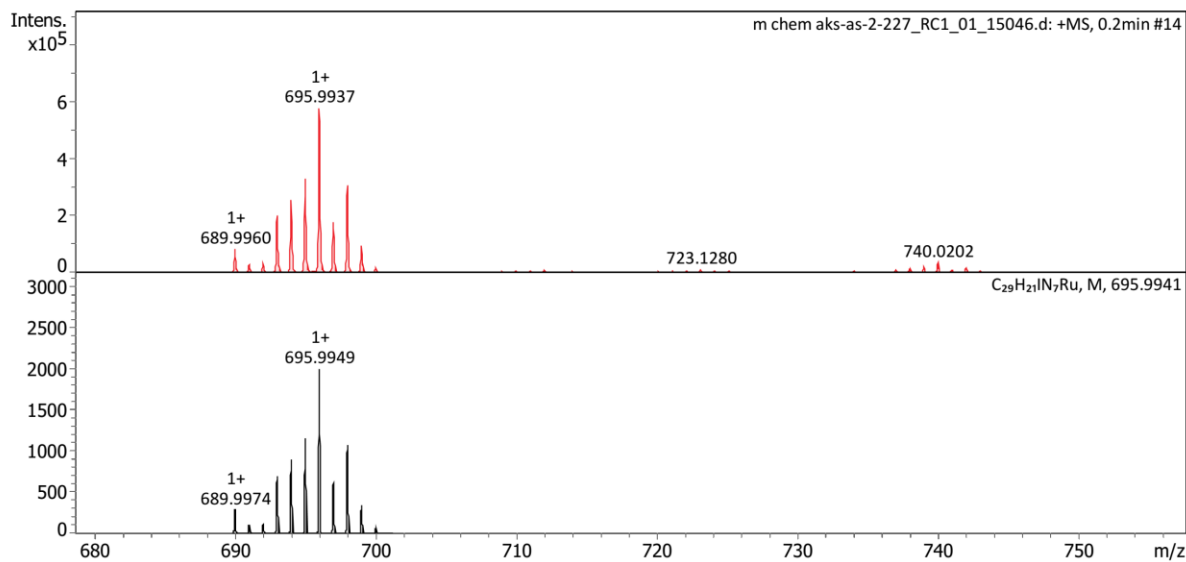

Figure S3 HRMS of complex Ru9.

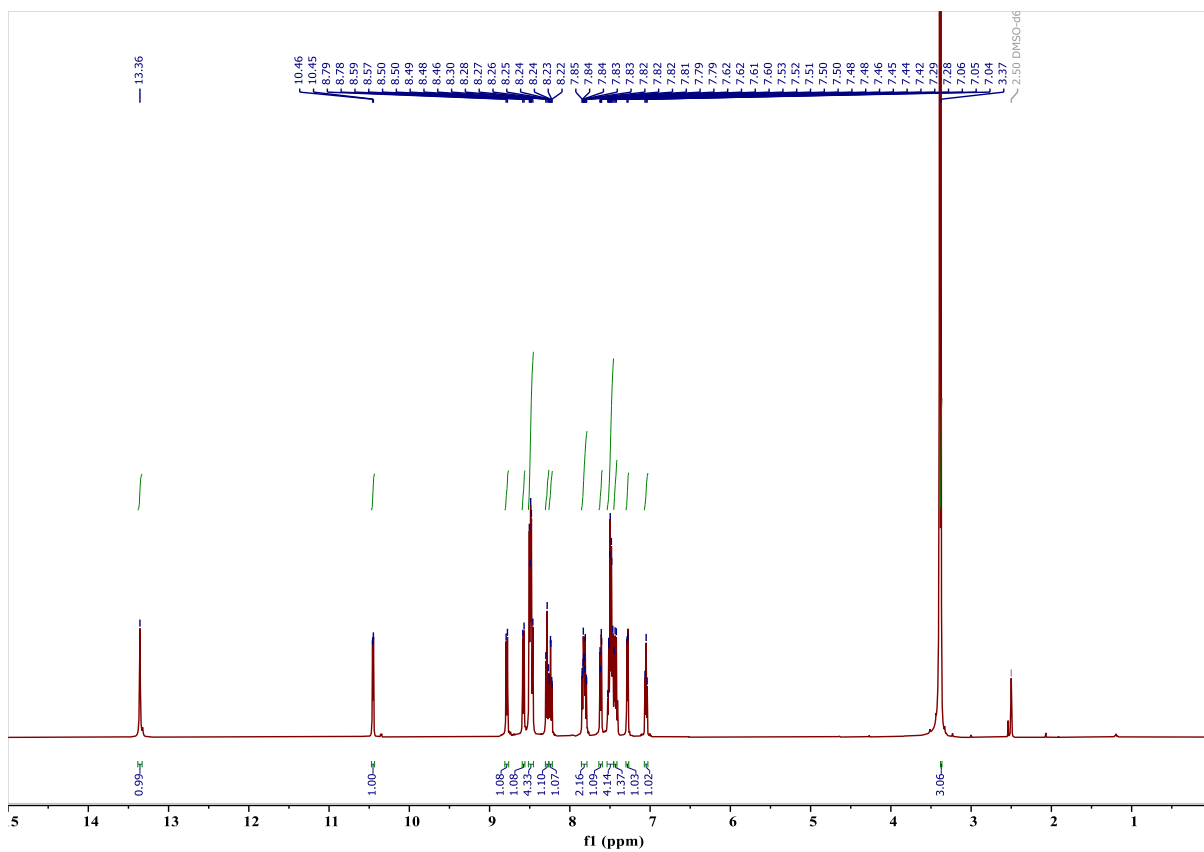

Figure S4  $^1\text{H}$  NMR of complex Ru10 in DMSO- $d_6$  solution.

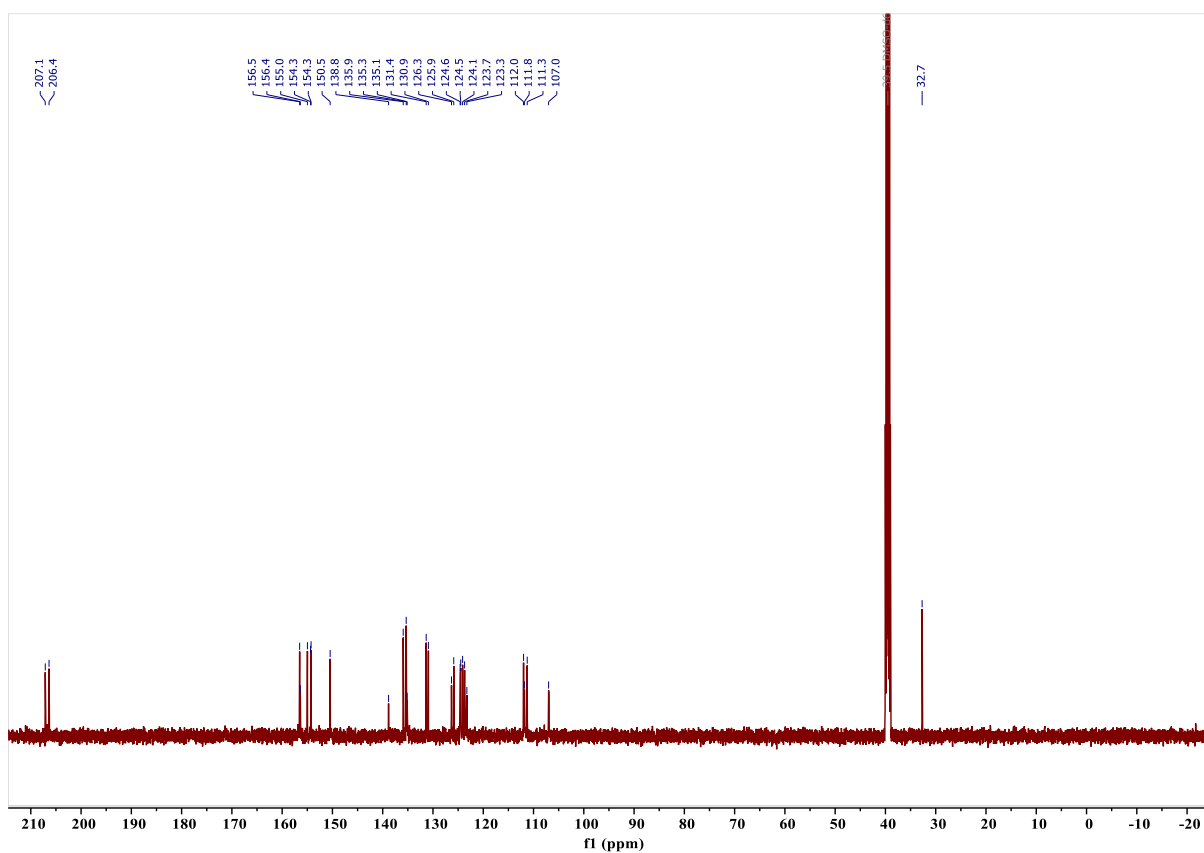

Figure S5  $^{13}\text{C}\{^1\text{H}\}$  NMR of complex Ru10 in DMSO- $d_6$  solution.

Software : MassLynx 4.2  
Retention Time : 0.391  
CHEM AKS-AS-2-222 (0.053) Is (1.00,1.00) C30H23IN7Ru

SIC IIT Indore  
XEVO-G3QTOF#YGA0590

26-Jun-2025 16:54:15  
LCHRMS Facility  
1: TOF MS ES+  
2.70e12

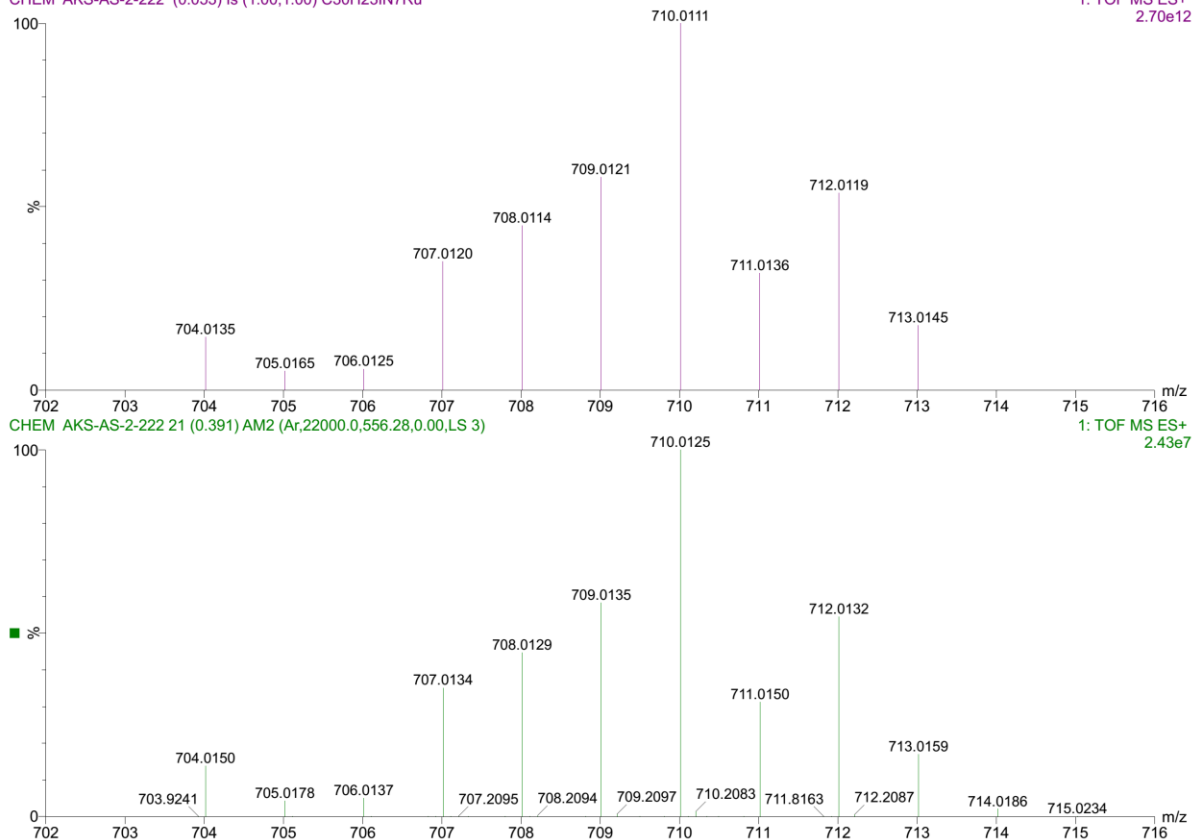

**Figure S6** HRMS of complex **Ru10**.

### General procedure for thermal transfer hydrogenation of inorganic carbonates using glycerol

A 60 mL pressure tube was charged with  $K_2CO_3$  (4mmol), ethanol (0.05 mL) in glycerol (1.0 mL), and a catalyst (1.0  $\mu$ mol). The sealed tube was stirred for 20 h in a silicone oil bath maintained at 160 °C. After completion, the reaction mixture was diluted with water (9 mL), and isonicotinic acid (0.05 mmol) was added as an internal standard (IS). For NMR analysis, 0.45 mL of the diluted solution was mixed with 0.15 mL of  $D_2O$ . Product quantification was carried out by comparing the integration of characteristic  $^1H$  NMR signals with that of the internal standard. The amount of formate was determined from the integration of the formate proton signal ( $HCOO^-$ ,  $\delta = 8.45$  ppm) relative to the internal standard signal ( $\delta = 8.60$  ppm). Turnover frequency (TOF) values after 20 h were calculated from the molar concentration of formate produced under these conditions. A representative calculation is provided below.

$$\text{mmol of formate} = \frac{(\text{integral of formate peak}/\text{no.of corresponding proton})}{(\text{integral of internal standard}/\text{no.of corresponding proton})} \times (\text{mmol of (IS)})$$

## General procedure for microwave-accelerated transfer hydrogenation of inorganic carbonates using glycerol

Microwave-accelerated reactions were carried out in a Milestone Start S microwave reactor equipped with a magnetic stirrer to ensure continuous mixing and a noncontact infrared sensor for real-time monitoring and precise control of the reaction temperature. In a typical experiment, a 60 mL sealed pressure tube was charged with the hydrogen donor (1.0 mL) (ethanol (0.05 mL) in glycerol, glycerol-water mixture, methanol, ethanol, isopropanol, or ethylene glycol, carbonate salt or base (4.0 mmol), the desired carbonate salt, and the catalyst. The reaction mixture was subjected to microwave irradiation under controlled temperature and time conditions, with continuous stirring to maintain homogeneity. Upon completion, the resulting products were analyzed by NMR spectroscopy using the procedure described above.

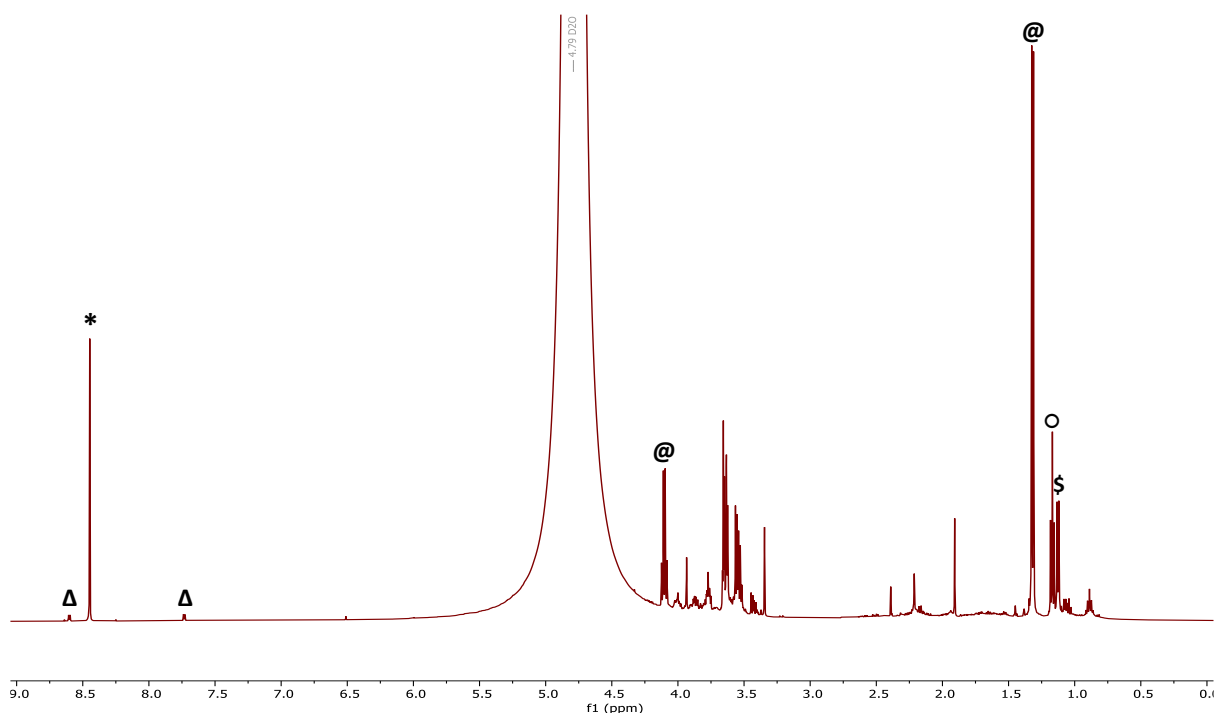

**Figure S7**  $^1\text{H}$  NMR spectrum of an aliquot of the reaction mixture obtained using glycerol as the hydrogen donor. Peaks are assigned as follows:  $\Delta$  = internal NMR standard (isonicotinic acid); \* = formate ( $\text{HCO}_2^-$ ); @ = lactate;  $\circ$  = ethanol,  $\$$  = 1,2-PDO

**Table S1.** Catalytic activity of Ru(II) NHC complexes in the microwave-accelerated transfer hydrogenation of varying amounts of carbonate salt using glycerol as the hydrogen source. The activity is expressed in terms of turnover numbers (TON) and turnover frequencies (TOF) for the formation of 1,2-propanediol (1,2-PDO), formic acid (FA), and lactic acid (LA). The corresponding results are graphically represented in Figure 4

| Complexes | TON     |         |         | TOF (h <sup>-1</sup> ) |         |         |
|-----------|---------|---------|---------|------------------------|---------|---------|
|           | 1,2-PDO | Formate | Lactate | 1,2-PDO                | Formate | Lactate |
| [Ru1]     | 4,523   | 9,286   | 11,190  | 38,768                 | 79,592  | 95,914  |
| [Ru5]     | 952     | 4,643   | 6,667   | 8,160                  | 39,796  | 57,146  |
| [Ru9]     | 3,809   | 5,714   | 9,167   | 32,648                 | 48,979  | 78,574  |
| [Ru10]    | 4,523   | 10,714  | 18,214  | 38,768                 | 91,836  | 156,120 |
| [Ru11]    | 4,167   | 8,928   | 10,357  | 35,717                 | 76,530  | 88,774  |

**Table S2.** Catalytic performance of **Ru10** in the microwave-accelerated transfer hydrogenation of various carbonate salts using glycerol as the hydrogen source. The activity is expressed in terms of turnover numbers (TON) and turnover frequencies (TOF) for the formation of 1,2-propanediol (1,2-PDO), formic acid (FA), and lactic acid (LA). The corresponding data are graphically illustrated in Figure 3. Relative excess terms are defined as follows:

$$\text{Rel. excess}_{\text{AD/TH}} = \frac{[\text{LA}] - ([\text{FA}] + [1,2\text{-PDO}])}{[\text{FA}] + [1,2\text{-PDO}]} \times 100$$

| Entry | Base                            | TON     |         |         | TOF (h <sup>-1</sup> ) |         |          | Relative excess AD/TH |
|-------|---------------------------------|---------|---------|---------|------------------------|---------|----------|-----------------------|
|       |                                 | 1,2-PDO | Formate | Lactate | 1,2-PDO                | Formate | Lactate  |                       |
| 1.    | KOH + CO <sub>2</sub>           | 714     | 2,500   | 6,666   | 6,120                  | 21,428  | 57,137   | 107                   |
| 2.    | NaHCO <sub>3</sub>              | 238     | 1,071   | 4,761   | 2,040                  | 9,180   | 40,808   | 264                   |
| 3.    | KHCO <sub>3</sub>               | 1,071   | 4,642   | 14,523  | 9,180                  | 39,788  | 1,24,483 | 154                   |
| 4.    | CaCO <sub>3</sub>               | 0       | 0       | 0       | 0                      | 0       | 0        | 0                     |
| 5.    | Li <sub>2</sub> CO <sub>3</sub> | 0       | 125     | 2,381   | 0                      | 1,071   | 20,408   | 1,804                 |
| 6.    | Na <sub>2</sub> CO <sub>3</sub> | 833     | 357     | 11,785  | 7,140                  | 3,060   | 1,01,014 | 890                   |
| 7.    | K <sub>2</sub> CO <sub>3</sub>  | 4,523   | 10,714  | 18,214  | 38,768                 | 91,836  | 1,56,120 | 19.5                  |
| 8.    | Cs <sub>2</sub> CO <sub>3</sub> | 5,000   | 18,571  | 67,619  | 42,857                 | 159,180 | 579,591  | 187                   |

9.  $\text{K}_2\text{CO}_3:\text{Cs}_2\text{CO}_3$  4,643 16,785 62,200 39,797 143,871 533,142 190  
(9:1)

**Table S3.** Catalytic activity of **Ru10** in the microwave-accelerated transfer hydrogenation of varying amounts of carbonate salt using glycerol as the hydrogen source. The activity is expressed in terms of turnover numbers (TON) and turnover frequencies (TOF) for the formation of 1,2-propanediol (1,2-PDO), formic acid (FA), and lactic acid (LA). The corresponding results are graphically represented in Figure 4.

| Base amount (mmol) | TON     |         |         | TOF     |         |         | Rel. excess % AD/TH |
|--------------------|---------|---------|---------|---------|---------|---------|---------------------|
|                    | 1,2-PDO | Formate | Lactate | 1,2-PDO | Formate | Lactate |                     |
| 1                  | 714     | 1,071   | 12,262  | 6,120   | 9,180   | 105,102 | 587                 |
| 2                  | 952     | 2,142   | 12,857  | 8,160   | 18,360  | 110,202 | 315                 |
| 3                  | 1,190   | 2,857   | 13,452  | 10,200  | 24,488  | 115,302 | 232                 |
| 4                  | 4,523   | 10,714  | 18,214  | 38,768  | 91,834  | 156,120 | 19                  |
| 5                  | 4,643   | 11,071  | 18,452  | 39,797  | 94,894  | 158,160 | 17                  |

### Procedure for time-dependent monitoring of the catalytic reaction

#### In thermal conditions (Figures 5a and 5b)

The general catalytic protocol outlined in Section III was adapted by employing ethanol (0.05 mL) in glycerol (1 mL),  $\text{K}_2\text{CO}_3$  (4 mmol), and **Ru10** (0.14  $\mu\text{mol}$ ). Reactions were carried out at 160 °C for up to 24 h. At predetermined time intervals, aliquots of the reaction mixture were collected and analyzed by  $^1\text{H}$  NMR spectroscopy to quantify turnover numbers (TON) at each time point. Each experiment was repeated four times to evaluate reproducibility, and the data presented in Figure 5b include error bars reflecting the observed experimental variations.

**Table S4.** Table summarizing the activity of **Ru10** for the thermal-accelerated transfer hydrogenation of different amounts of carbonate salts from glycerol at different times.

| Time (h) | TON of 1,2-PDO | TON of Formate | TON of Lactate |
|----------|----------------|----------------|----------------|
| 1        | 0              | 78             | 357            |
| 2        | 0              | 154            | 833            |
| 3        | 0              | 157            | 595            |
| 4        | 119            | 300            | 2,262          |
| 5        | 119            | 357            | 2,024          |
| 6        | 238            | 714            | 4,762          |
| 8        | 238            | 1,428          | 7,500          |
| 10       | 238            | 1,786          | 10,476         |
| 15       | 476            | 2,857          | 15,119         |
| 20       | 595            | 3,214          | 18,809         |
| 24       | 833            | 2,143          | 19,048         |

#### **In microwave heating conditions (Figures 6a and 6b)**

The general catalytic protocol outlined in Section III was adapted by employing ethanol (0.05 mL) in glycerol (1 mL), K<sub>2</sub>CO<sub>3</sub> (4 mmol), and **Ru10** (0.14 μmol). Reactions were carried out at 50 °C for up to 20 min. At predetermined time intervals, aliquots of the reaction mixture were collected and analyzed by <sup>1</sup>H NMR spectroscopy to quantify turnover numbers (TON) at each time point. Each experiment was repeated four times to evaluate reproducibility, and the data presented in Figure 6b include error bars reflecting the observed experimental variations.

**Table S5.** Table summarizing the activity of **Ru10** for the microwave-accelerated transfer hydrogenation of different amounts of carbonate salts from glycerol at different times up to 20 mins.

| Time (min) | TON of 1,2-PDO | TON of Formate | TON of Lactate |
|------------|----------------|----------------|----------------|
| 3          | 357            | 1,788          | 11,190         |
| 5          | 1,309          | 7,142          | 13,571         |
| 7          | 4,523          | 10,714         | 18,214         |
| 10         | 4,643          | 10,714         | 18,452         |
| 20         | 4,880          | 10,714         | 36,905         |

## Mechanistic Investigation

### I. NMR experiment for evaluating the regeneration of the protic-NHC complex in the presence of glycerol

All NMR experiments were carried out under an inert nitrogen atmosphere within a glovebox to exclude air and moisture. In situ monitoring of the reaction was performed using a J. Young NMR tube, which was charged with complex **Ru10** (35 mg, 0.041 mmol) dissolved in DMSO- $d_6$  (0.5 mL). The progress of the reaction was followed by recording  $^1\text{H}$  NMR spectra on a 500 MHz spectrometer. The characteristic  $^1\text{H}$  NMR resonances of the protic NHC complex were observed at  $\delta$  13.36 (s, 1H), 10.45 (d,  $J = 4.4$  Hz, 1H), 8.79 (d,  $J = 8.2$  Hz, 1H), 8.58 (d,  $J = 8.2$  Hz, 1H), 8.54–8.44 (m, 4H), 8.28 (t,  $J = 8.3$  Hz, 1H), 8.24 (td,  $J = 7.9, 1.6$  Hz, 1H), 7.86–7.76 (m, 2H), 7.61 (dd,  $J = 7.2, 2.1$  Hz, 1H), 7.54–7.46 (m, 4H), 7.47–7.38 (m, 1H), 7.28 (d,  $J = 5.9$  Hz, 1H), 7.05 (t,  $J = 6.7$  Hz, 1H), and 3.37 (s, 3H).

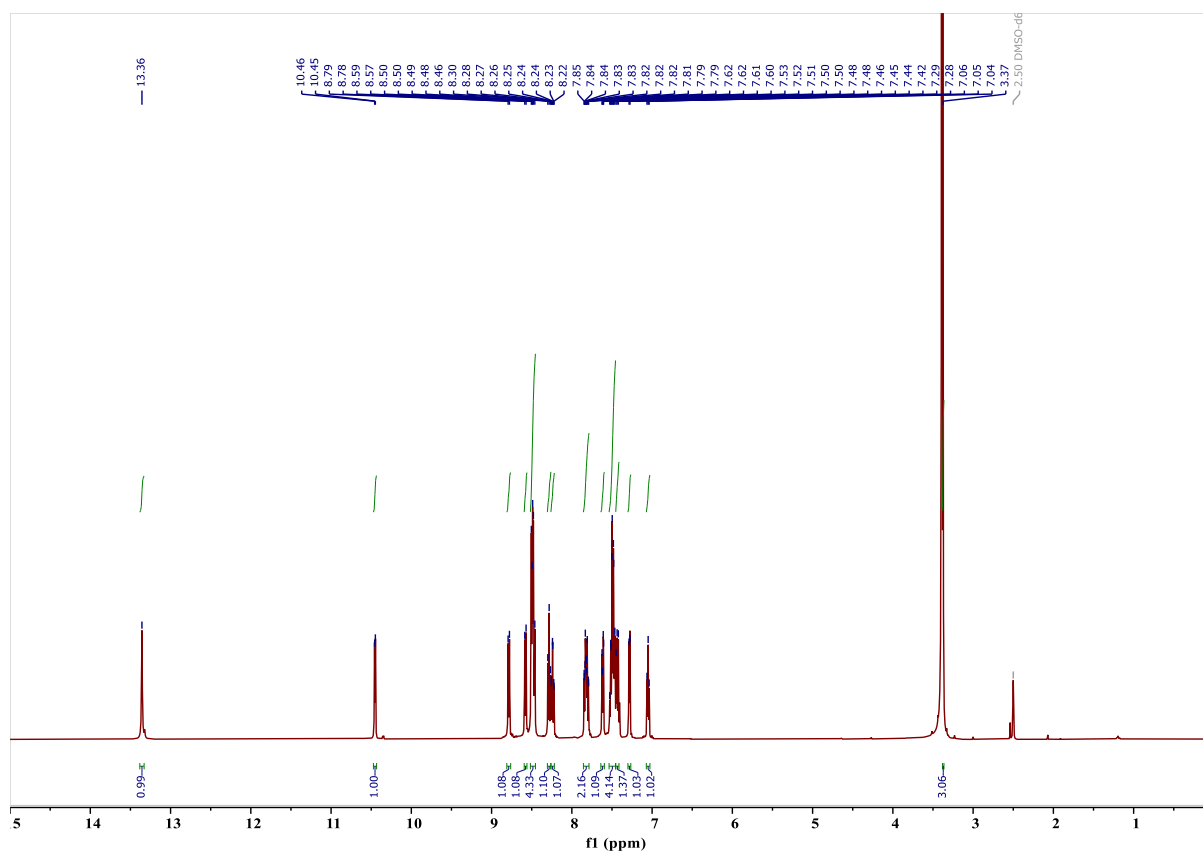

**Figure S8**  $^1\text{H}$  NMR of complex **Ru10** in  $\text{DMSO-d}_6$

**Step 1: In situ generation of **Ru10'**:** Following the initial NMR characterization of complex **Ru10** (35 mg, 0.041 mmol), an equimolar amount of  $\text{K}_2\text{CO}_3$  (5.66 mg, 0.041 mmol) dissolved in  $\text{H}_2\text{O}$  was introduced into the J. Young NMR tube containing the complex in  $\text{DMSO-d}_6$  (0.5 mL). The addition immediately induced a distinct color change to orange-red, indicative of the in-situ formation of a new species, designated as **Ru10'**. The tube was sealed with a Teflon screw-cap to maintain an inert environment, briefly agitated to ensure homogeneity, and subsequently subjected to NMR analysis. The  $^1\text{H}$  NMR spectrum recorded at 500 MHz ( $\text{DMSO-d}_6$ ) displayed resonances at  $\delta$  9.99 (d,  $J = 4.5$  Hz, 1H), 8.71 (d,  $J = 6.9$  Hz, 1H), 8.58 (d,  $J = 8.2$  Hz, 1H), 8.48 (d,  $J = 8.1$  Hz, 1H), 8.43 (t,  $J = 8.2$  Hz, 1H), 8.37 (d,  $J = 8.2$  Hz, 1H), 8.20 (t,  $J = 7.7$  Hz, 2H), 8.04 (d,  $J = 7.1$  Hz, 1H), 7.88–7.78 (m, 2H), 7.66 (d,  $J = 6.7$  Hz, 1H), 7.59–7.48 (m, 2H), 7.32 (dd,  $J = 7.4, 1.6$  Hz, 1H), 7.20–7.03 (m, 4H), and 3.45 (s, 3H).  $^{13}\text{C}\{^1\text{H}\}$  NMR (126 MHz,  $\text{DMSO-d}_6$ )  $\delta$  202.6, 194.3, 155.4, 154.4, 154.2, 153.8, 153.6, 148.6, 147.8, 143.0, 137.5, 136.4, 136.2, 133.1, 131.6, 126.6, 125.2, 125.1, 124.3, 123.6, 122.8, 121.5, 117.5, 112.8, 112.1, 110.9, 106.6, and 33.7.

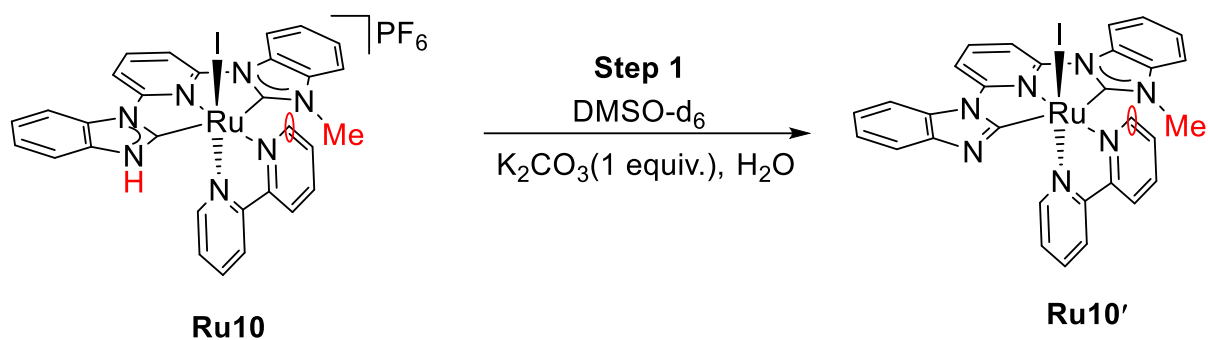

**Scheme S1** In situ formation of **Ru10'**

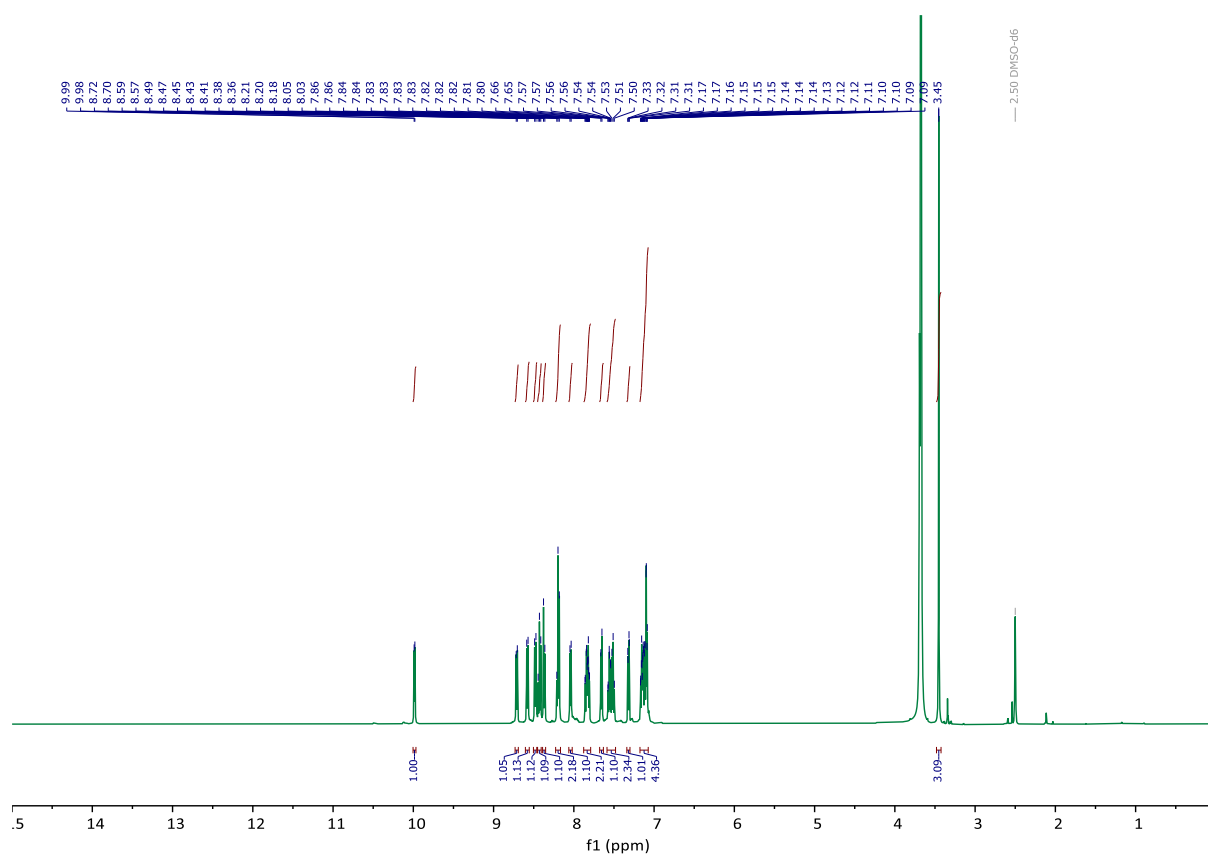

**Figure S9** <sup>1</sup>H NMR of complex **Ru10'** in DMSO-d<sub>6</sub>

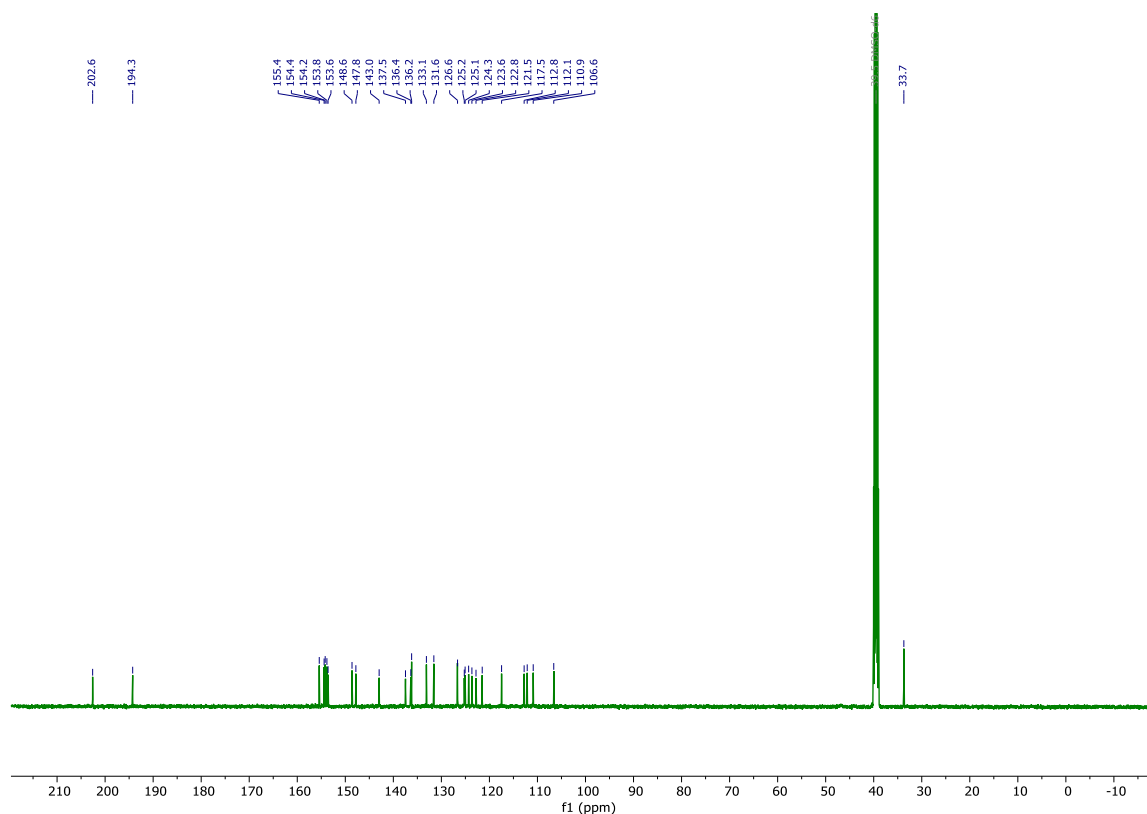

**Figure S10**  $^{13}\text{C}$  NMR of complex **Ru10'** in  $\text{DMSO-d}_6$

**Step 2: No Regeneration of complex Ru10:** In the subsequent experiment, two equivalents of glycerol were introduced into the J. Young NMR tube containing **Ru10'**. The tube was sealed with a Teflon screw-cap to ensure an airtight environment, vigorously agitated, and allowed to stand overnight at room temperature. The reaction progress was monitored by recording  $^1\text{H}$  NMR spectra on a 500 MHz spectrometer. The resulting spectra revealed no evidence for the regeneration of the protic NHC complex **Ru10**, as indicated by the absence of the diagnostic NH resonance. Moreover, no appreciable change in the chemical shifts of the observed signals was detected. Even upon heating the NMR tube to  $80\text{ }^\circ\text{C}$  for 1 h, the  $^1\text{H}$  NMR spectrum remained essentially unchanged, thereby confirming that glycerol does not promote the in situ regeneration of **Ru10** under the examined conditions (Scheme S2).

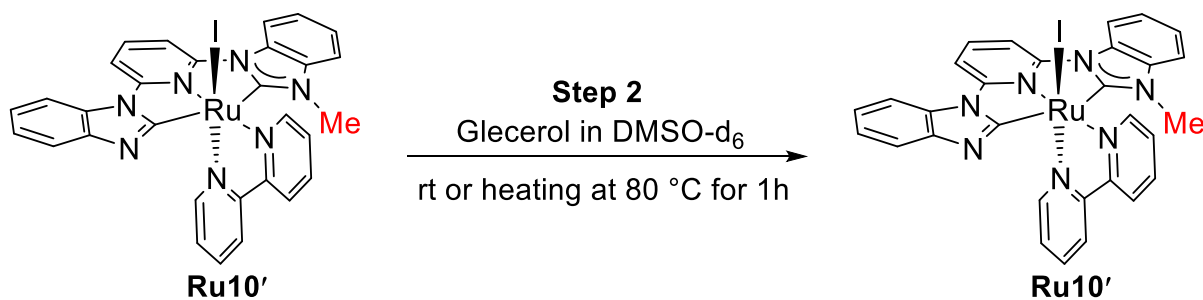

**Scheme S2** Addition of glycerol to **Ru10'** at rt and heating at  $80\text{ }^\circ\text{C}$ .

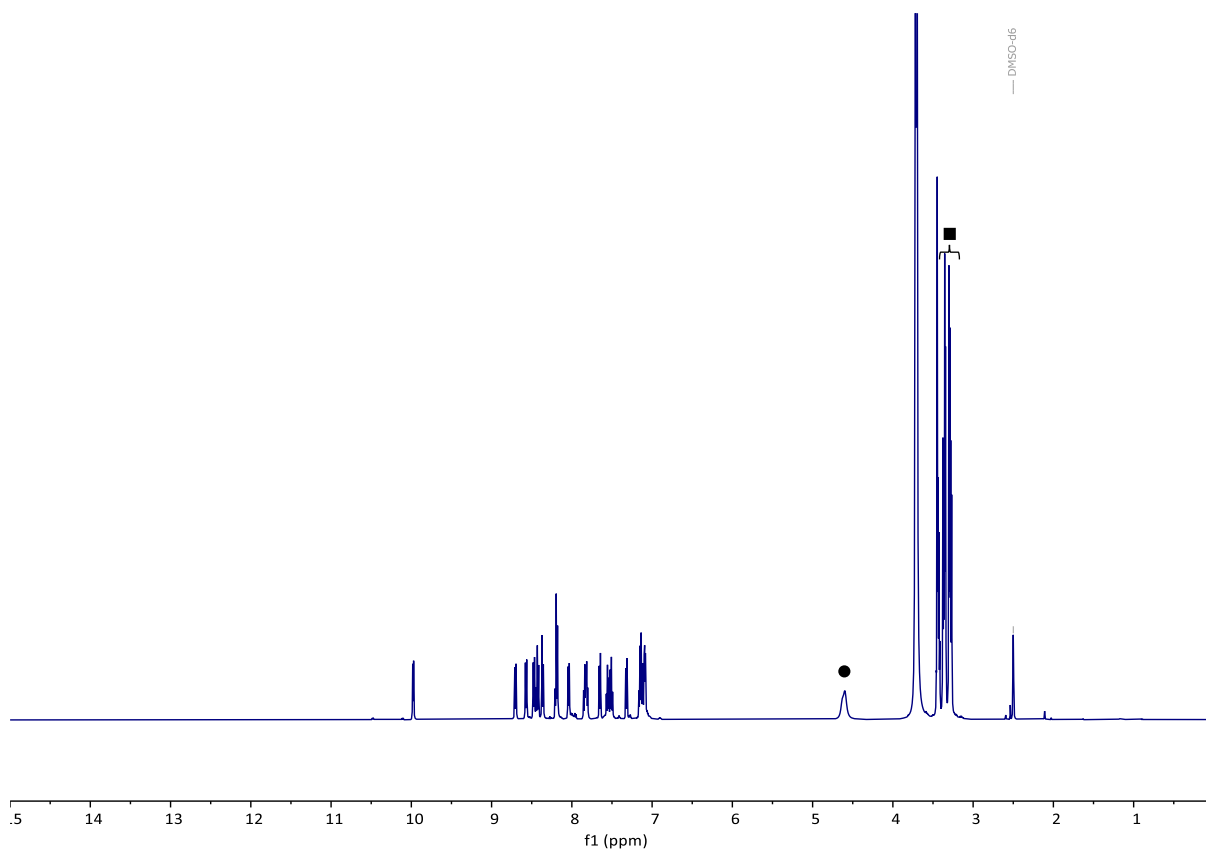

**Figure S11**  $^1\text{H}$  NMR spectra of **Ru10'** after the addition of glycerol and  $\text{K}_2\text{CO}_3$ , recorded at room temperature and upon heating to  $80\text{ }^\circ\text{C}$ . • denotes the OH resonance of glycerol; ■ denotes the  $\text{CH}_2$  resonance of glycerol.

**Reaction of Ru10 with  $\text{KHCO}_3$ :** Following the initial NMR characterization of complex **Ru10** (35 mg, 0.041 mmol), an equimolar amount of  $\text{KHCO}_3$  (4.1 mg, 0.041 mmol) dissolved in  $\text{H}_2\text{O}$  was introduced into the J. Young NMR tube containing the complex in  $\text{DMSO-d}_6$  (0.5 mL). The addition didn't show any color change. The tube was sealed with a Teflon screw-cap to maintain an inert environment, briefly agitated to ensure homogeneity, and subsequently subjected to NMR analysis, which confirmed that the complex Ru10 remained intact in the presence of  $\text{KHCO}_3$ .

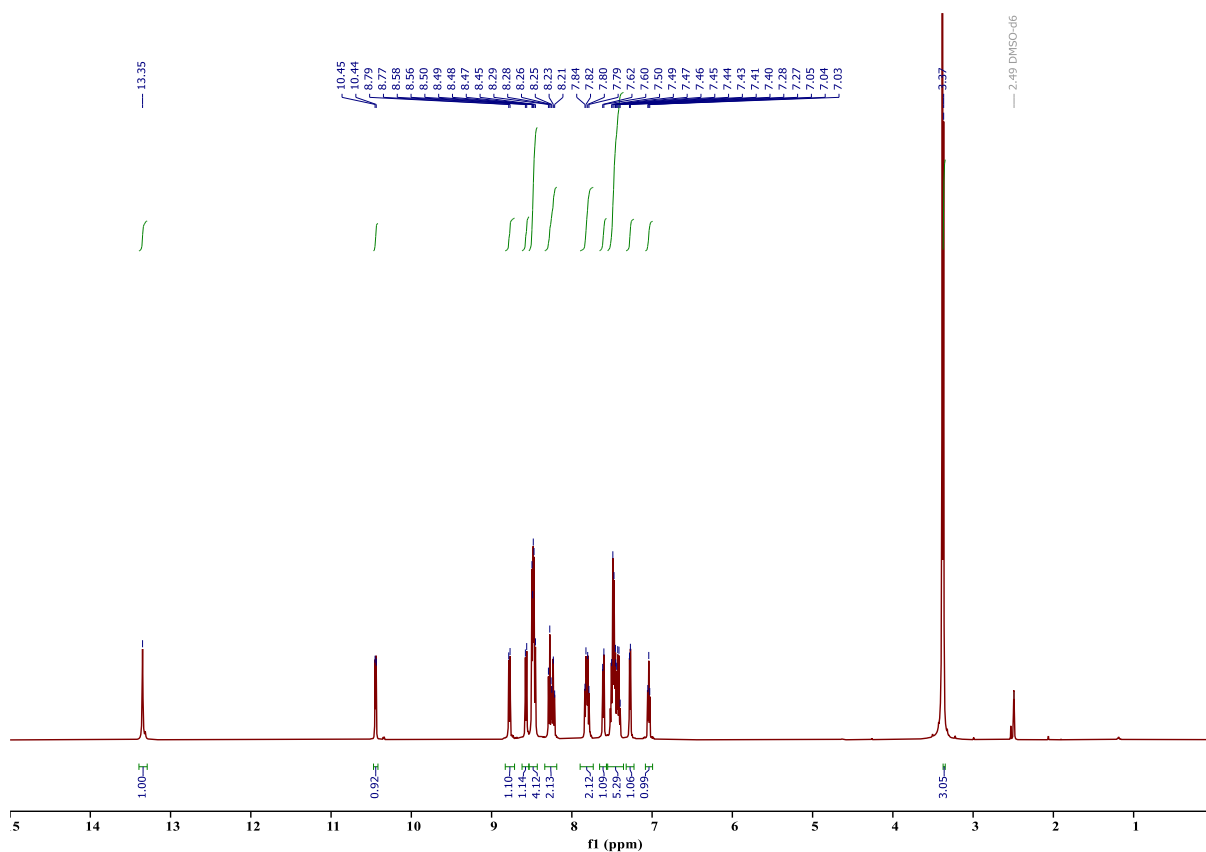

**Figure S12**  $^1\text{H}$  NMR of complex **Ru10** in DMSO- $d_6$  in presence of  $\text{KHCO}_3$ .

**II. In situ generation of Ru-hydride complex:** The deprotonated complex **Ru10'** (0.05 mmol, 35 mg) was dissolved in DMSO- $d_6$  (300  $\mu\text{L}$ ) in a J. Young NMR tube. To this solution, glycerol (2 equiv., 0.10 mmol, 7.3  $\mu\text{L}$ ) and  $\text{K}_2\text{CO}_3$  (2 equiv., 0.10 mmol, 13.8 mg, dissolved in 200  $\mu\text{L}$   $\text{H}_2\text{O}$ ) were added sequentially. The NMR tube was sealed with a Teflon screw-cap and heated at 90  $^\circ\text{C}$ . The reaction progress was monitored on a 500 MHz NMR spectrometer. Analysis of the resulting mixture by  $^1\text{H}$  NMR spectroscopy revealed the appearance of a characteristic hydride resonance at  $\delta$  -7.75 ppm (Figure S12).

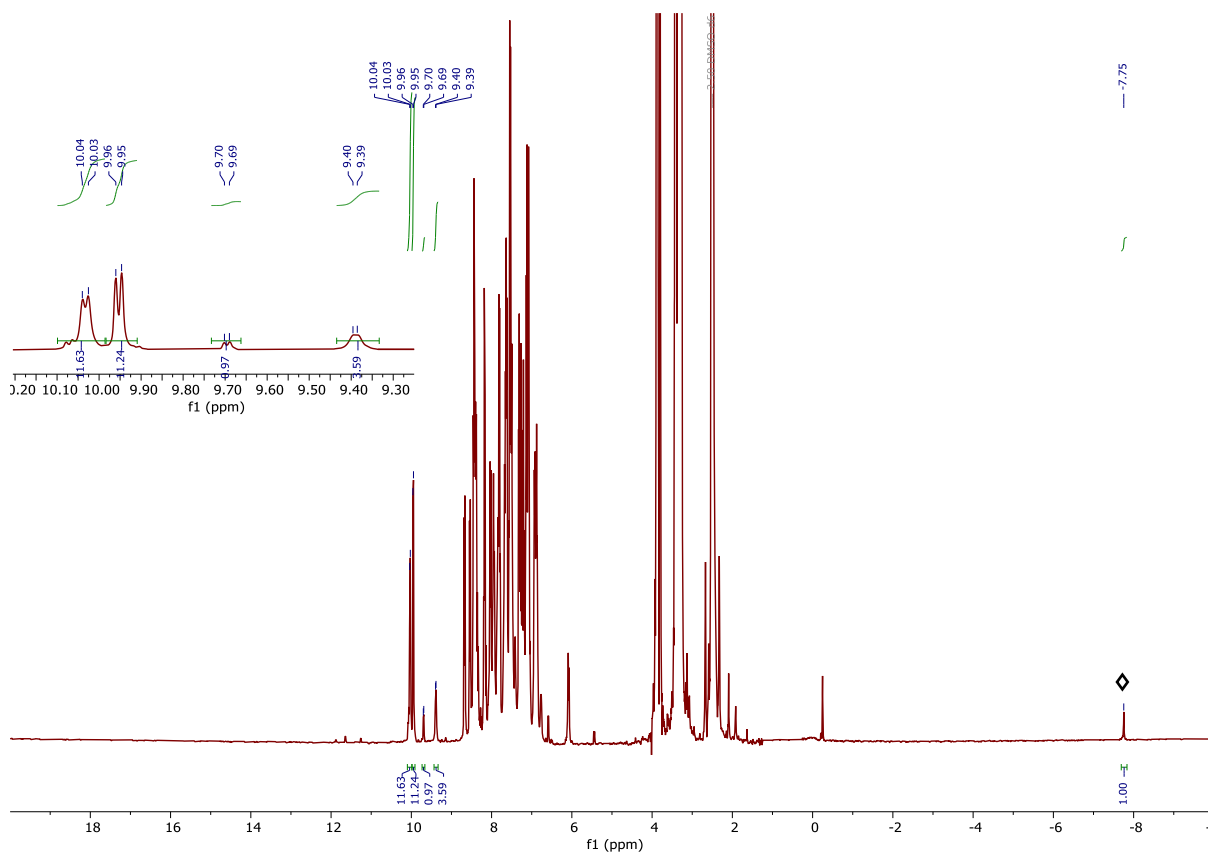

**Figure S13**  $^1\text{H}$  NMR spectrum in  $\text{DMSO-d}_6$  showing the in situ generation of the ruthenium-hydride intermediate,  $\diamond$  indicates a Ru-H peak

**III. To check the generation of free  $\text{CO}_2$ :** The reaction was performed with **Ru10** with the addition of two equivalents of glycerol and  $\text{K}_2\text{CO}_3$  into the J. Young NMR. The tube was sealed with a Teflon screw-cap to ensure an airtight environment, vigorously agitated, and allowed to stand overnight at room temperature. The reaction progress was monitored by recording  $^{13}\text{C}$  NMR spectra on a 500 MHz spectrometer. The resulting spectra revealed no extra peak at  $\delta$  125, which is evidence for the generation of  $\text{CO}_2$ .

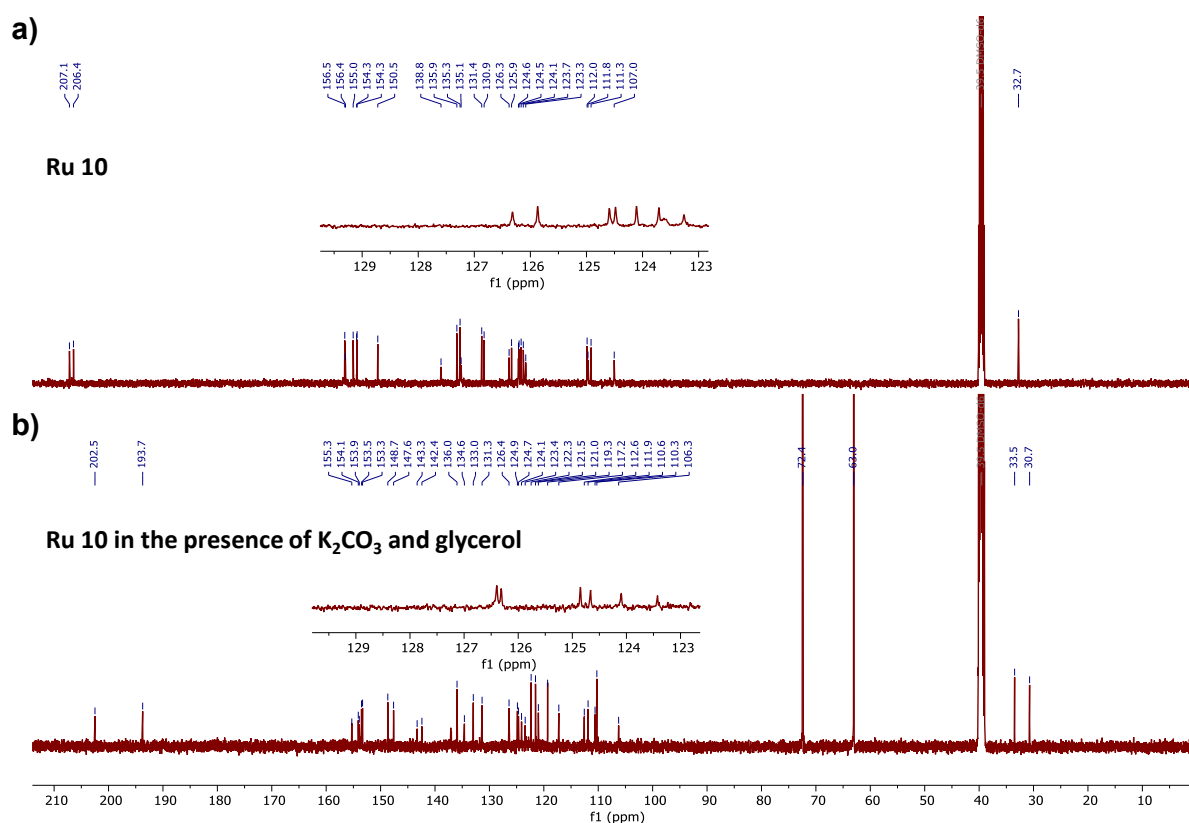

**Figure S14**  $^{13}\text{C}$  NMR spectrum in  $\text{DMSO-d}_6$  showing a) complex **Ru10** and b) complex **Ru10** in presence of  $\text{K}_2\text{CO}_3$  and glycerol ( $\delta$  72.4 and 63.0)

### Mechanistic investigation using mass spectrometry.

To gain further insight into the mechanistic pathway, mass spectrometric analysis was performed. In experiment (a), the deprotonated species of complex **Ru10** was examined. The NMR sample obtained after the addition of  $\text{K}_2\text{CO}_3$  to complex **Ru10** (step 1) was subjected to mass analysis, which confirmed the successful deprotonation of **Ru10**. Notably, when methanol was employed as a protic solvent during data collection, the deprotonated complex **Ru10'** was observed by LC-MS as the ion  $[\text{M}-\text{I}]^+$  with the molecular formula  $\text{C}_{30}\text{H}_{22}\text{N}_7\text{Ru}$ . The experimental  $m/z$  value of 581.9619 closely matched the calculated value of 582.0988, thereby corroborating the structural assignment.

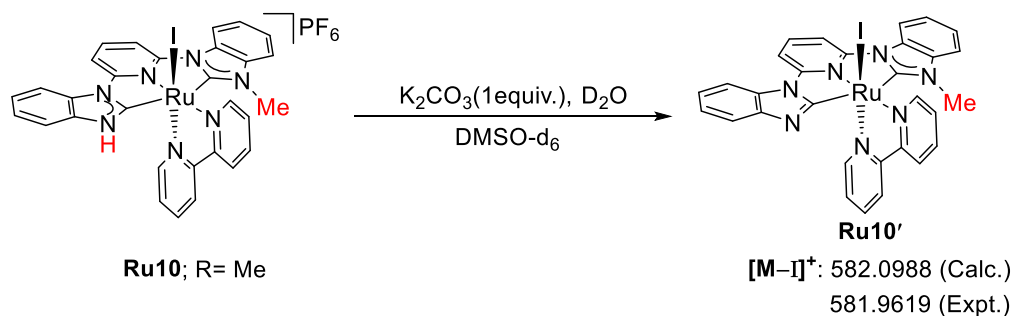

**Scheme S3.** Deprotonation of complex **Ru10**.

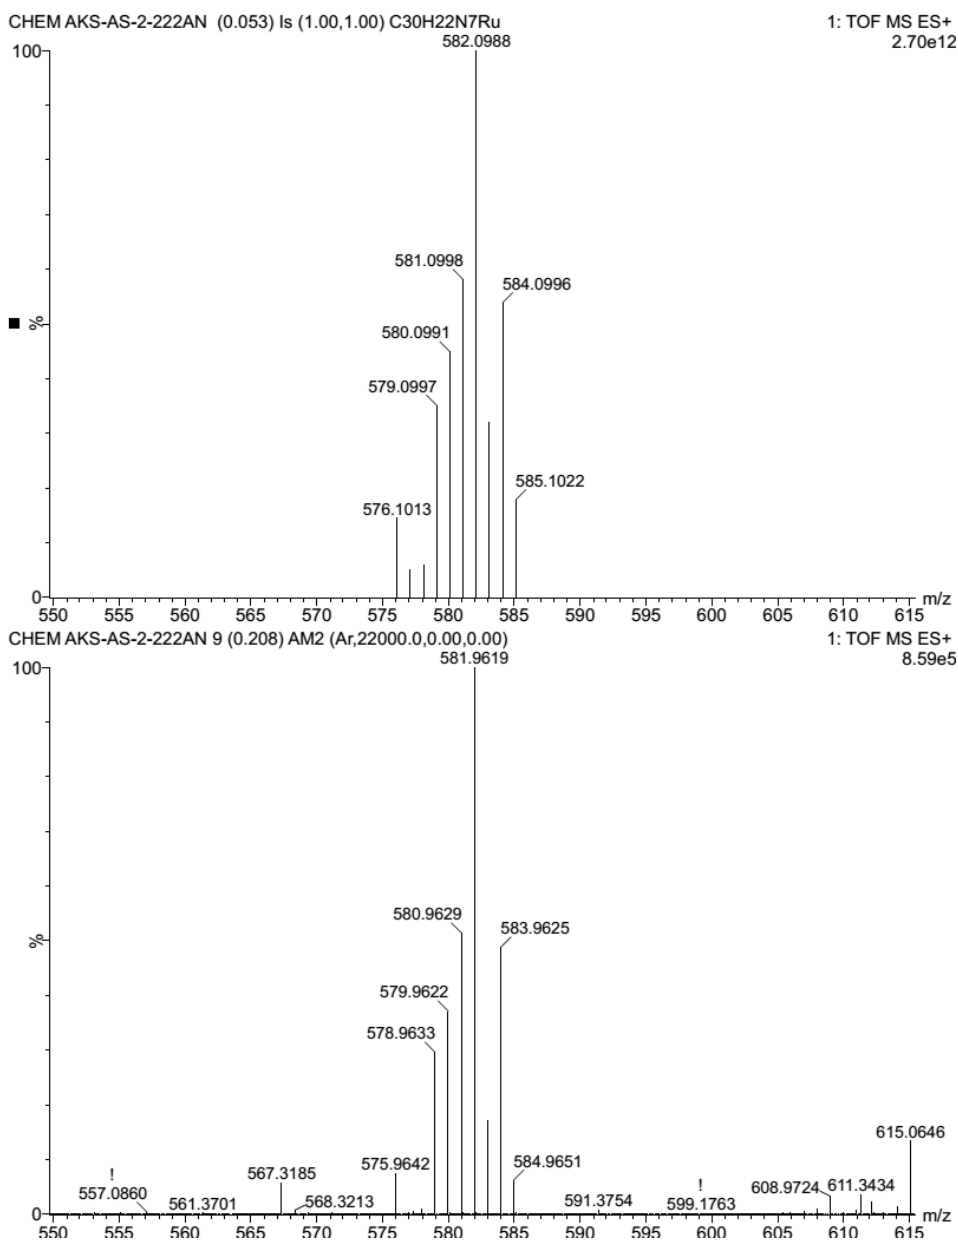

**Figure S15** LC-MS spectrum of the NMR sample from experiment **step 1**, collected in acetonitrile (ACN).

**(b) Detection of alkoxy intermediate I:** Further mechanistic insight was obtained from LC-MS analysis of the catalytic reaction mixture, which provided clear evidence for the generation of a key transient alkoxy intermediate. This species, designated as intermediate I, was detected with the molecular formula C<sub>33</sub>H<sub>29</sub>N<sub>7</sub>O<sub>3</sub>Ru. The LC-MS showed an experimental m/z value of 673.1044, in close agreement with the calculated value of 673.1384, thereby supporting the involvement of this alkoxy intermediate in the catalytic cycle.

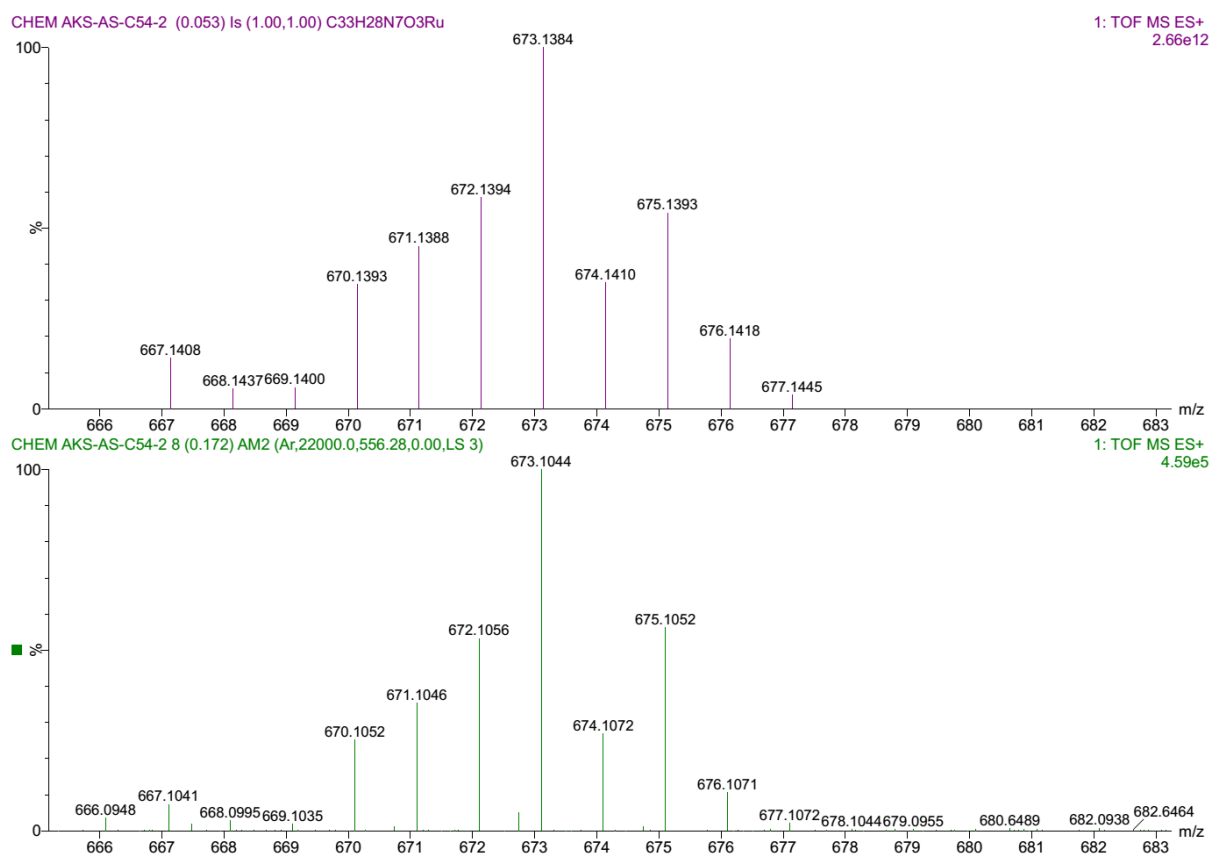

**Figure S16** LC-MS spectrum showing the detection of the Ru-alkoxy intermediate (intermediate I) in the catalytic reaction mixture.

**(c) Detection of formate intermediate VII:** LC-MS analysis of the catalytic reaction mixture provided compelling evidence for the formation of a key transient formate intermediate. This species, designated as intermediate **VII**, corresponds to a Ru-OOCH complex with the molecular formula  $C_{31}H_{24}N_7O_2Ru$ . LC-MS confirmed its identity, showing an experimental  $m/z$  value of 628.1043, which is in close agreement with the calculated value of 628.1402. These results strongly support the participation of a Ru-formate species in the catalytic cycle.

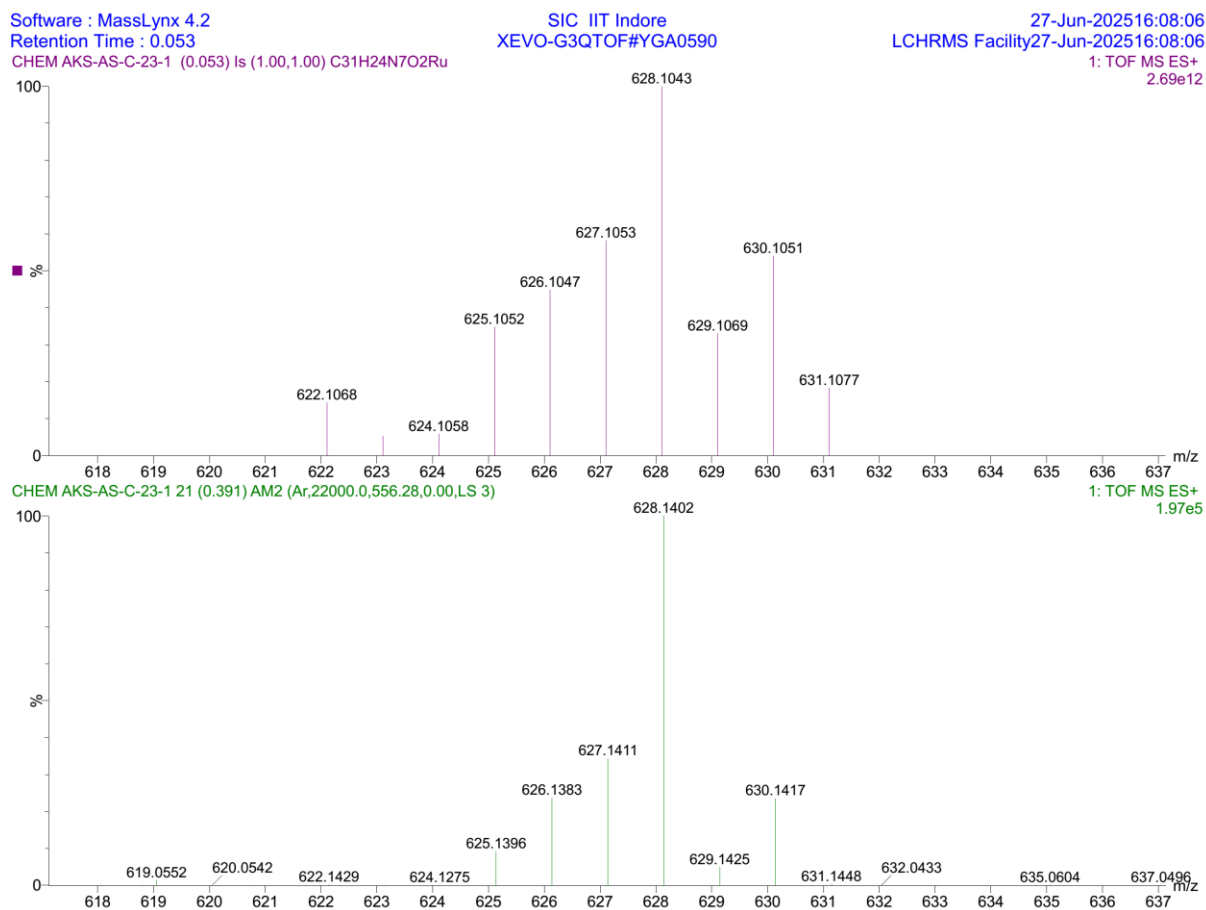

**Figure S17** LC-MS spectrum showing the detection of the Ru–formate intermediate (intermediate **VII**) in the catalytic reaction mixture

### Mercury Test/Homogeneous Test

An oven-dried 60 mL pressure tube was charged with ethanol (0.05 mL) in glycerol (1.0 mL), mercury (1 equiv.), and a catalyst **Ru10** (0.14  $\mu\text{mol}$ ). The sealed tube was stirred for 20 h in a silicone oil bath maintained at 160 °C. After completion, product quantification was carried out by the aforesaid method.

### Radical trapping experiment

An oven-dried 60 mL pressure tube was charged with ethanol (0.05 mL) in glycerol (1.0 mL), 4-hydroxy-TEMPO (1 equiv.), and a catalyst **Ru10** (0.14  $\mu\text{mol}$ ). The reaction mixture was subjected to microwave irradiation under controlled temperature (50  $\pm$  2 °C) for 7 minutes, with continuous stirring to maintain homogeneity. Upon completion, the resulting products were analyzed by NMR spectroscopy using the procedure described above.

**Crystallographic Data: Table S6** Crystal data and structure refinement parameters.

|                                         | <b>Ru9</b>                                                         |
|-----------------------------------------|--------------------------------------------------------------------|
| <b>Empirical formula</b>                | C <sub>29</sub> H <sub>21</sub> F <sub>6</sub> IN <sub>7</sub> PRu |
| <b>Formula weight</b>                   | 840.47                                                             |
| <b>Temperature/K</b>                    | 298                                                                |
| <b>Crystal system</b>                   | monoclinic                                                         |
| <b>Space group</b>                      | P2 <sub>1</sub> /n                                                 |
| <b>a/Å</b>                              | 10.2849(4)                                                         |
| <b>b/Å</b>                              | 34.0048(12)                                                        |
| <b>c/Å</b>                              | 10.4093(3)                                                         |
| <b>α/°</b>                              | 90                                                                 |
| <b>β/°</b>                              | 111.852(4)                                                         |
| <b>γ/°</b>                              | 90                                                                 |
| <b>Volume/Å<sup>3</sup></b>             | 3378.9(2)                                                          |
| <b>Z</b>                                | 4                                                                  |
| <b>ρ<sub>calc</sub>/cm<sup>3</sup></b>  | 1.652                                                              |
| <b>μ/mm<sup>-1</sup></b>                | 1.488                                                              |
| <b>F(000)</b>                           | 1640.0                                                             |
| <b>Radiation</b>                        | MoKα (λ = 0.71073)                                                 |
| <b>2θ range for data collection/°</b>   | 5.96 to 58.452                                                     |
| <b>Reflections collected</b>            | 35146                                                              |
| <b>Independent reflections</b>          | 8326 [R <sub>int</sub> = 0.0971]                                   |
| <b>Data/restraints/parameters</b>       | 8326/0/434                                                         |
| <b>Goodness-of-fit on F<sup>2</sup></b> | 1.035                                                              |
| <b>Final R indexes [I ≥ 2σ (I)]</b>     | R <sub>1</sub> = 0.0667, wR <sub>2</sub> = 0.179                   |
| <b>Final R indexes [all data]</b>       | R <sub>1</sub> = 0.1004, wR <sub>2</sub> = 0.1996                  |

## General method for transfer hydrogenation of acetophenone

An oven-dried Schlenk tube equipped with a magnetic stirring bar was loaded with catalyst **Ru10** (0.25 mol%), KO<sup>t</sup>Bu (10 mol%), and anhydrous solvent (methanol or ethanol or 2-propanol) (3 mL). Next, add the acetophenone (1 mmol) to the reaction mixture. After that, the Schlenk tube was placed in a preheated oil bath (70 °C for methanol, 85 °C for ethanol or 2-propanol) with stirring. At the end of the reaction catalytic solution was analyzed on a GC-MS QP 2010 ultra-mass spectrometer equipped with an FID detector.

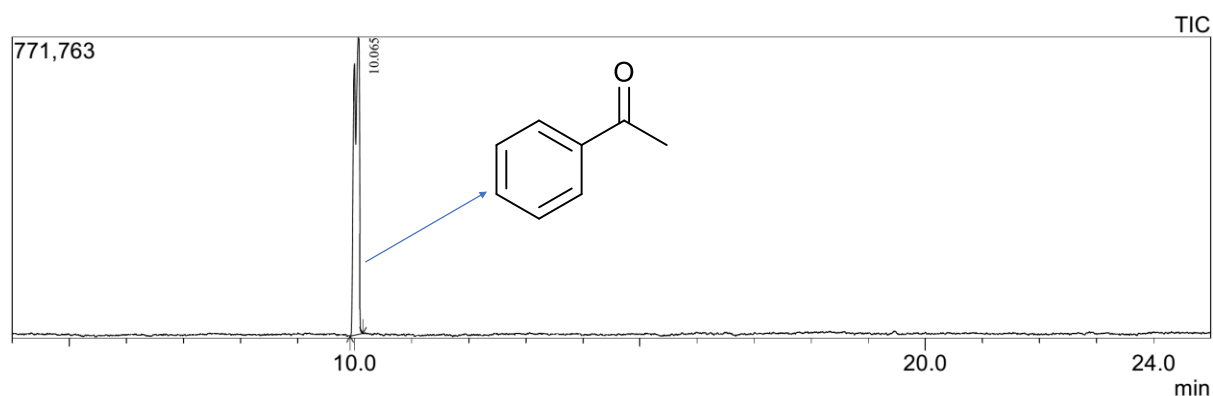

Peak Report TIC

| Peak# | R.Time | Area    | Area%  | Height | Height% | A/H  | Name         |
|-------|--------|---------|--------|--------|---------|------|--------------|
| 1     | 10.065 | 4962732 | 100.00 | 761615 | 100.00  | 6.52 | Acetophenone |
|       |        | 4962732 | 100.00 | 761615 | 100.00  |      |              |

Spectrum

Line#:1 R.Time:10.065(Scan#:1214)  
MassPeaks:267  
RawMode:Averaged 10.060-10.070(1213-1215) BasePeak:105(260455)  
BG Mode:Calc. from Peak Group 1 - Event 1 Scan

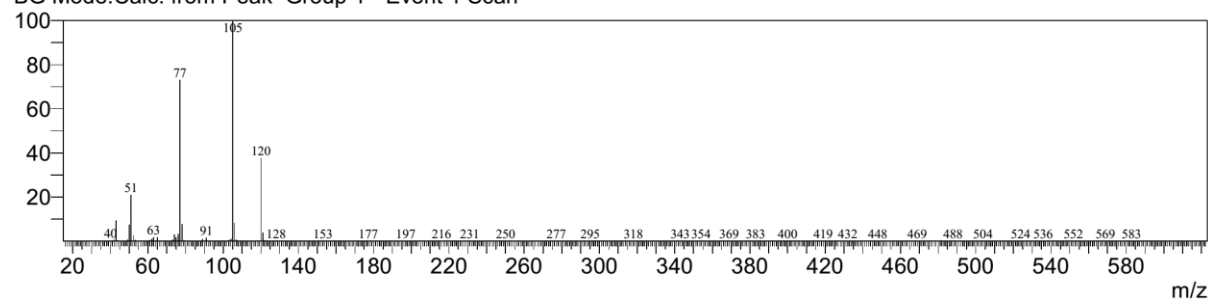

**Figure S18** GC-MS analysis for the transfer hydrogenation of acetophenone by catalyst **Ru10** using methanol

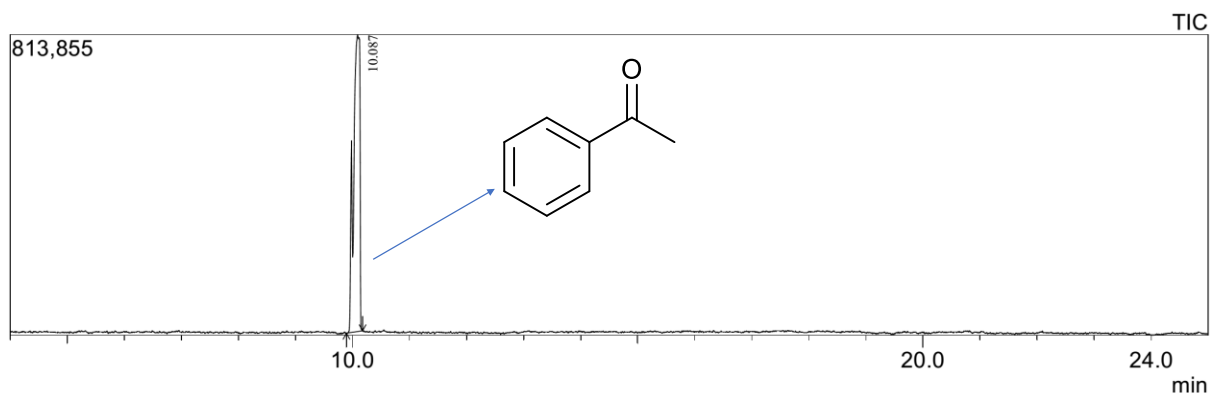

Peak Report TIC

| Peak# | R.Time | Area    | Area%  | Height | Height% | A/H  | Name         |
|-------|--------|---------|--------|--------|---------|------|--------------|
| 1     | 10.087 | 6372420 | 100.00 | 806945 | 100.00  | 7.90 | Acetophenone |
|       |        | 6372420 | 100.00 | 806945 | 100.00  |      |              |

Spectrum

Line#:1 R.Time:10.085(Scan#:1218)

MassPeaks:291

RawMode:Averaged 10.080-10.090(1217-1219) BasePeak:105(271350)

BG Mode:Calc. from Peak Group 1 - Event 1 Scan

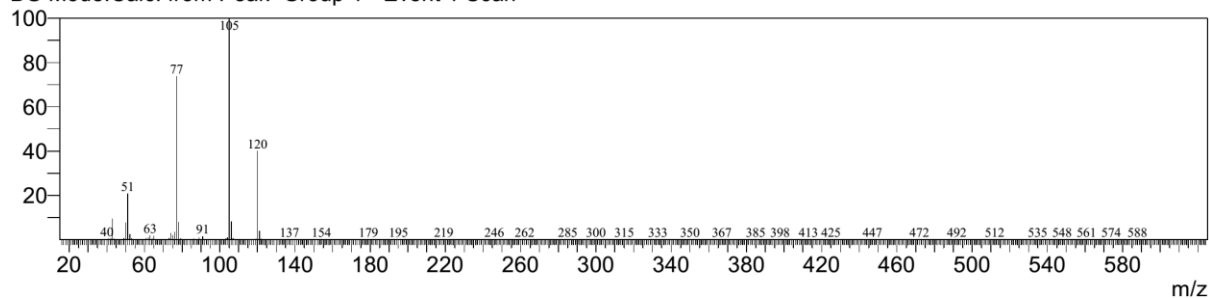

**Figure S19** GC-MS analysis for the transfer hydrogenation of acetophenone by catalyst **Ru10** using ethanol

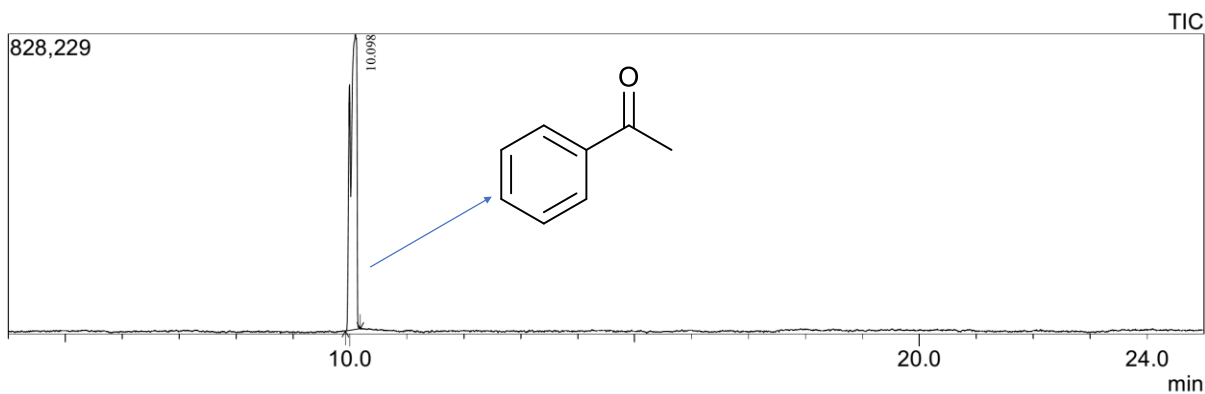

Peak Report TIC

| Peak# | R.Time | Area    | Area%  | Height | Height% | A/H  | Name         |
|-------|--------|---------|--------|--------|---------|------|--------------|
| 1     | 10.098 | 6564558 | 100.00 | 815201 | 100.00  | 8.05 | Acetophenone |
|       |        | 6564558 | 100.00 | 815201 | 100.00  |      |              |

Spectrum

Line#:1 R.Time:10.100(Scan#:1221)

MassPeaks:309

RawMode:Averaged 10.095-10.105(1220-1222) BasePeak:105(268183)

BG Mode:Calc. from Peak Group 1 - Event 1 Scan

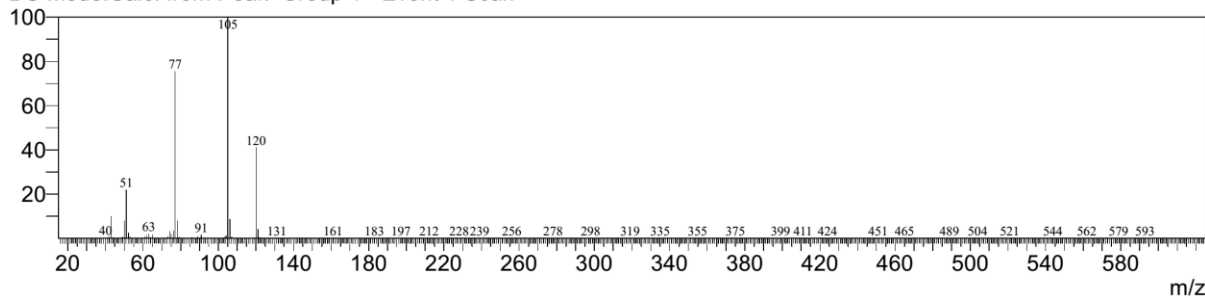

**Figure S20** GC-MS analysis for the transfer hydrogenation of acetophenone by catalyst **Ru10** using 2-propanol

## Transfer hydrogenation of acetophenone using glycerol as solvent

An oven-dried Schlenk tube equipped with a magnetic stirring bar was loaded with catalyst **Ru10** (0.25 mol%), KO<sup>t</sup>Bu (10 mol%), and glycerol (3 mL). Next, add the acetophenone (1 mmol) to the reaction mixture. After that, the Schlenk tube was placed in a preheated oil bath (100 °C) with stirring. At the end of the reaction catalytic solution was analyzed by NMR.

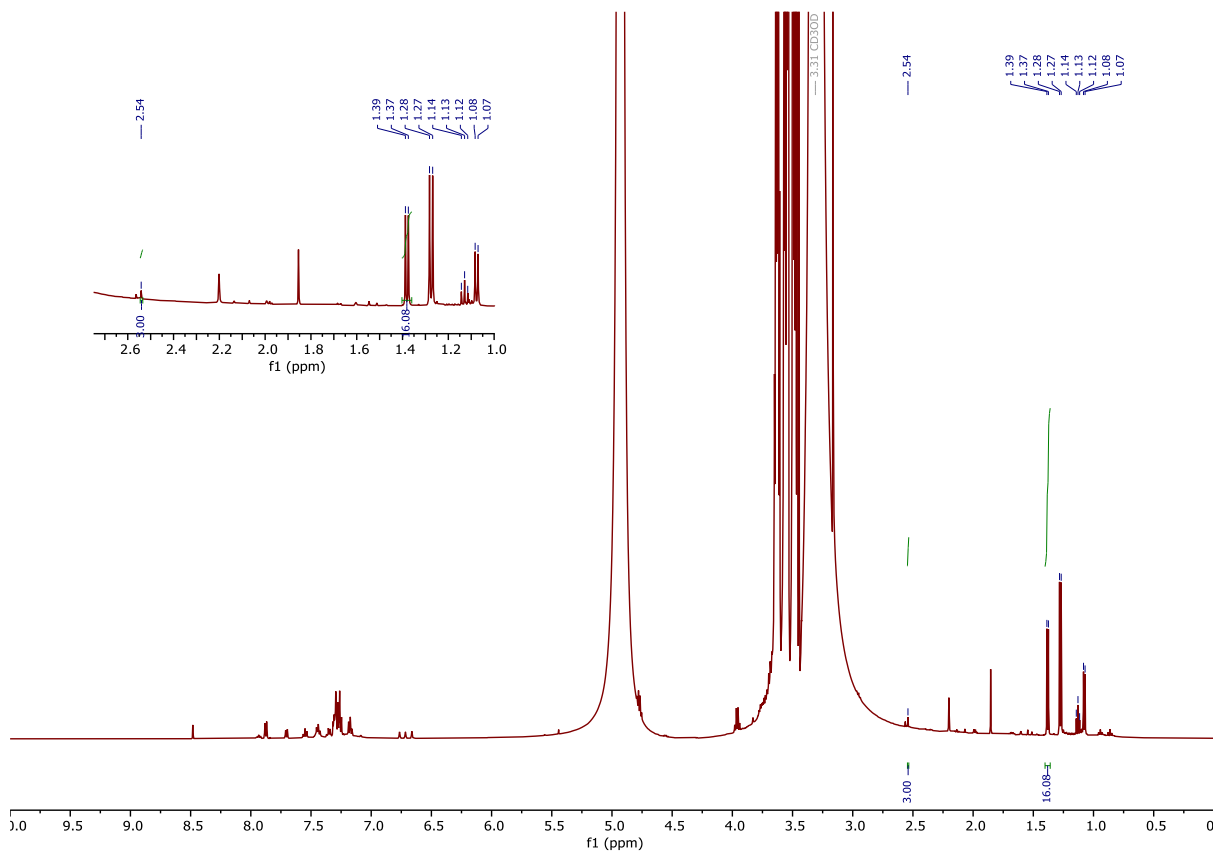

**Figure S21** NMR analysis for the transfer hydrogenation of acetophenone by catalyst **Ru10** using glycerol
